# Supplementary material for: Magainin II modified polydiacetylene micelles for cancer therapy
Source: Royal Society of Chemistry journal article supplement (doi:10.1039/c4nr04405c), 2014-10-02
Supplement: c4nr04405c1.pdf [file c4nr04405c1.pdf]

## SUPPORTING INFORMATION

---

# Magainin II Modified Polydiacetylene Micelles for Cancer Therapy

Danling Yang, Rongfeng Zou, Yu Zhu, Ben Liu, Defang Yao, Juanjuan Jiang,

Junchen Wu\* and He Tian\*

Key Lab for Advanced Materials and Institute of Fine Chemicals, East China University of

Science and Technology, Shanghai, 200237, P. R. China.

Address: Telephone: (+86)-21-6425-3674, Fax: (+86)-21-6425-2288;

E-mail: jcwu@ecust.edu.cn; E-mail: tianhe@ecust.edu.cn

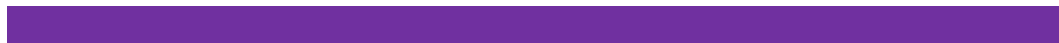

## Contents

|                                                    |   |
|----------------------------------------------------|---|
| 1. Synthesis of hemicyanine dye (compound 3) ..... | 1 |
| 2. HPLC analysis of MGN-II-DA .....                | 3 |
| 3. M-TOF analysis of MGN-II-DA .....               | 4 |
| 4. Zeta potential measurement .....                | 5 |
| 5. The time-lapse images of A549 cells .....       | 5 |
| 6. Cytotoxicity assay .....                        | 6 |
| Reference .....                                    | 7 |

## 1. Synthesis of hemicyanine dye (compound 3)

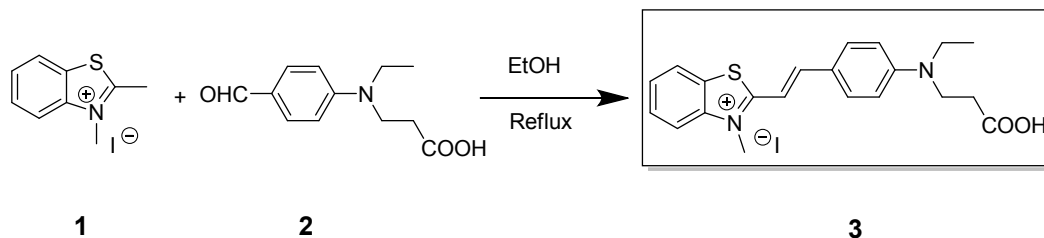

Compound **3** was synthesized according to the literature.<sup>1-2</sup> A mixture of compound **1** (5.82 g, 20.0 mmol) and compound **2** (4.43 g, 20.0 mmol) in EtOH (60 mL) was refluxed for 12 h. EtOH was removed under reduced pressure to obtain a dark red residue. The residue was washed three times with Et<sub>2</sub>O (80 mL) to remove unreacted starting materials. The crude products were purified by column chromatography on silica gel with mixed chloroform-petroleum ether as eluent. Compound **3** was obtained as a red solid powder 2.3 g, yield 23.0 %.

<sup>1</sup>H NMR (400 MHz, DMSO-*d*<sub>6</sub>): δ [ppm] 1.12-1.16 (t, *J* = 6.8 Hz, 3H), 2.55-2.58 (t, *J* = 7.2 Hz, 2H), 3.51-3.56 (dd, *J* = 7.2 Hz, *J* = 14 Hz, 2H), 3.67-3.71 (t, *J* = 6.8 Hz, 2H), 4.23 (s, 3H), 6.85-6.87 (d, *J* = 8.8 Hz, 2H), 7.60-7.70 (m, 1H), 7.77-7.81 (m, 1H), 7.90-7.91 (d, *J* = 9.2 Hz, 2H), 8.05-8.11 (t, *J* = 8.8 Hz, 2H), 8.29-8.31 (d, *J* = 8 Hz, 1H).

<sup>13</sup>C NMR (100 MHz, DMSO-*d*<sub>6</sub>): δ [ppm] 172.9, 171.3, 151.3, 150.0, 141.9, 133.1, 128.8, 127.4, 126.8, 123.8, 121.5, 115.9, 111.8, 106.2, 56.0, 45.1, 44.6, 40.1, 39.9, 39.7, 39.5, 39.3, 39.1, 38.9, 35.6, 32.2, 18.5, 12.2.

**<sup>1</sup>H NMR**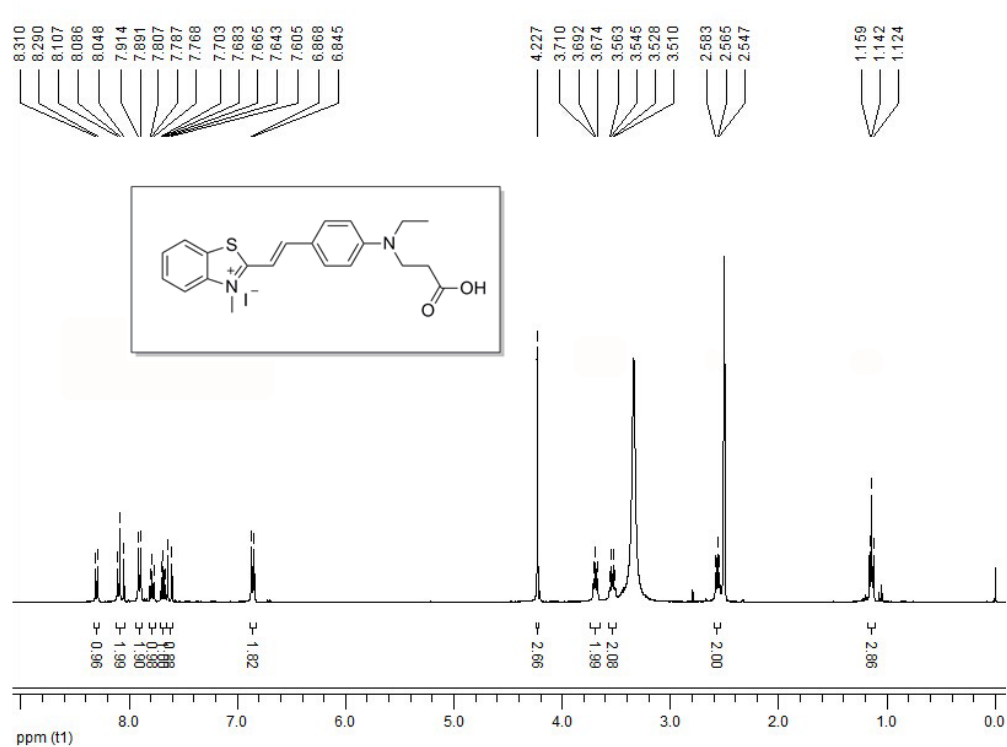**<sup>13</sup>C NMR**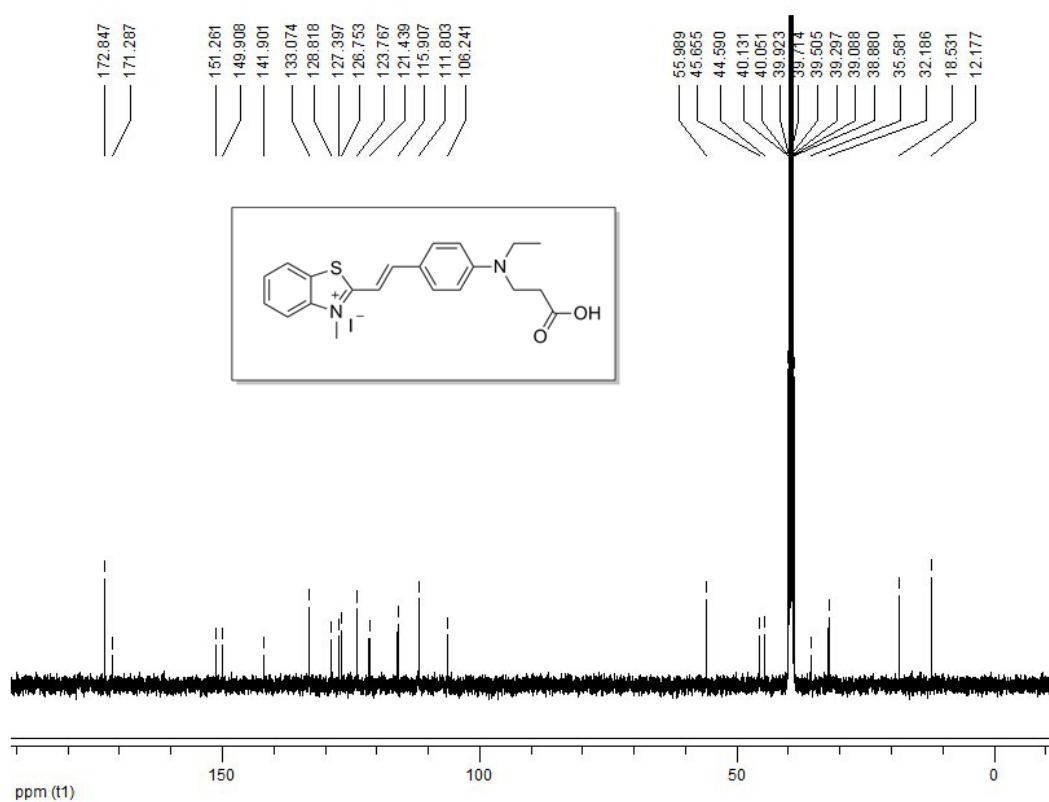

## 2. HPLC analysis of MGN-II-DA

Reverse-phase HPLC (AKTA purifier 100, GE Healthcare, USA) was performed with a RP-C18 HPLC column and UV detector. The mobile phase was a gradient of 35-100% of acetonitrile aqueous solution containing 0.1% TFA at a total flow rate of 1 mL/min. The UV absorption peaked at 530 nm was recorded for analysis.

UNICORN 5.31 (Build 743)  
Run by: default 7/6/2013 02:24:08 PM China Standard Time  
Result file: c:\...\Default\ydl\pep1\ydlfx001  
Method file: c:\...\Default\clfx

### UNICORN Report

#### Chromatogram

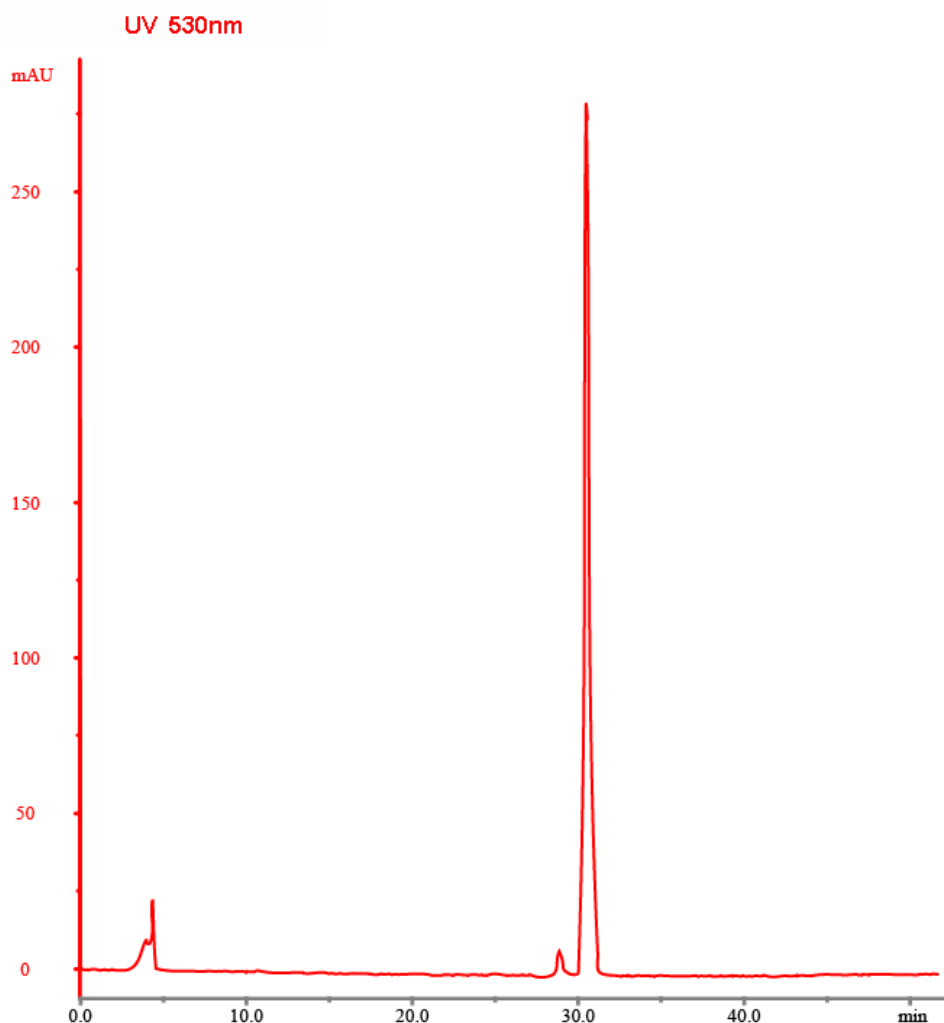

**Figure S1.** HPLC analysis report of MGN-II-DA

### 3. M-TOF analysis of MGN-II-DA

Mass spectra were acquired on a 4800 Plus MALDI TOF/TOF Analyzer (AB SCIEX, USA). Prior to MALDI-TOF-MS analysis, a volume of 0.5  $\mu\text{L}$  of peptide solution was spotted on a MALDI plate, 0.5  $\mu\text{L}$  of matrix solution (4 mg/mL CHCA dissolved in 50% aqueous  $\text{CH}_3\text{CN}$  containing 0.1% TFA) was deposited on the sample and allowed to air-dry at room temperature. All MALDI-TOF-MS measurement was performed in positive ion mode using a 4800 Plus M-TOF/TOF Analyzer (AB SCIEX, USA).

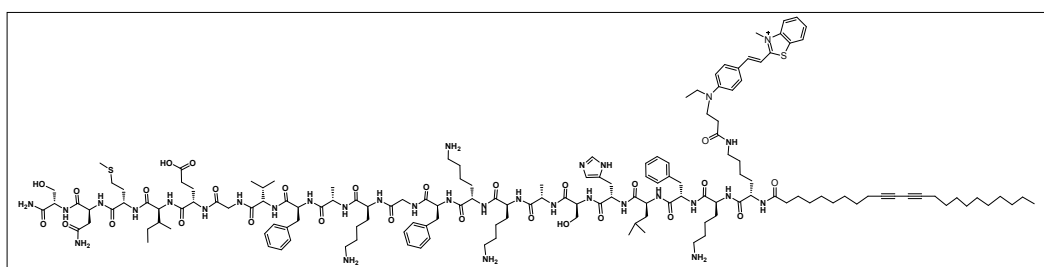

**Scheme S1.** Chemical structure of MGN-II-DA

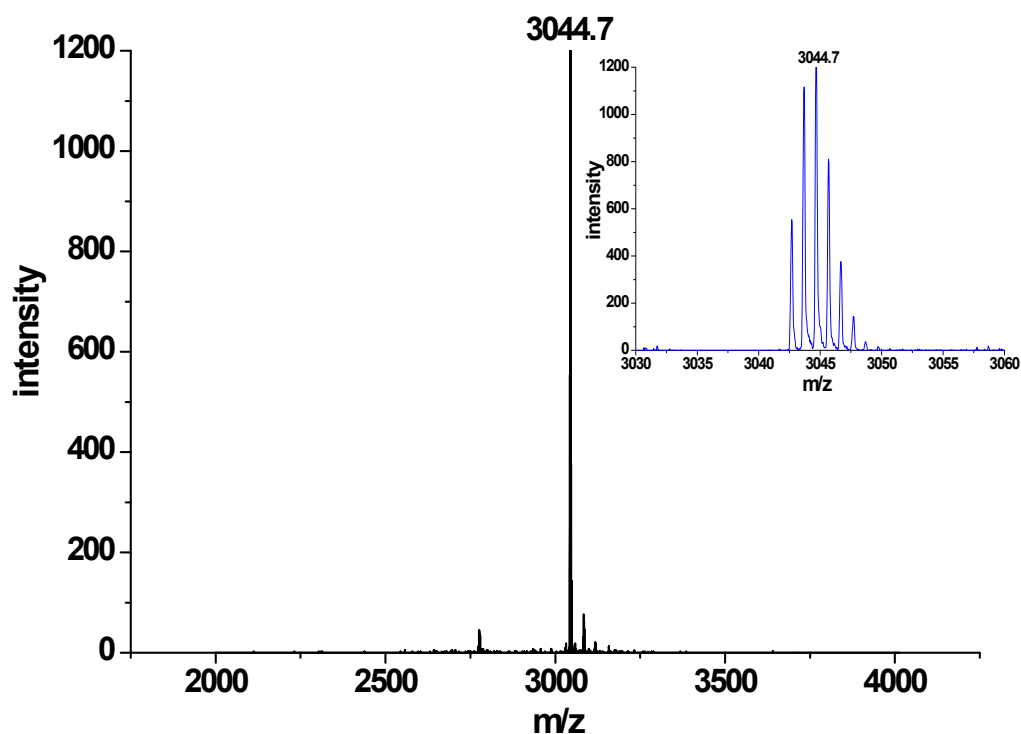

**Figure S2.** M-TOF analysis of MGN-II-DA

#### 4. Zeta potential measurement.

The zeta potential of MGN-II-PDA was measured in PBS (pH = 7.4, 25°C) using Nano-ZS (Zeta sizer, Malvern) instrument. All data were corrected by subtracting a blank scan of the buffer system. Results were presented as mean  $\pm$  SD (n=3).

#### 5. The time-lapse images of A549 cells.

A549 cells were seeded in a glass-bottomed dish. After overnight culture, the cells were incubated with MGN-II-PDA in RPMI-1640 medium at a final concentration of 16  $\mu$ g/mL at 37 °C.

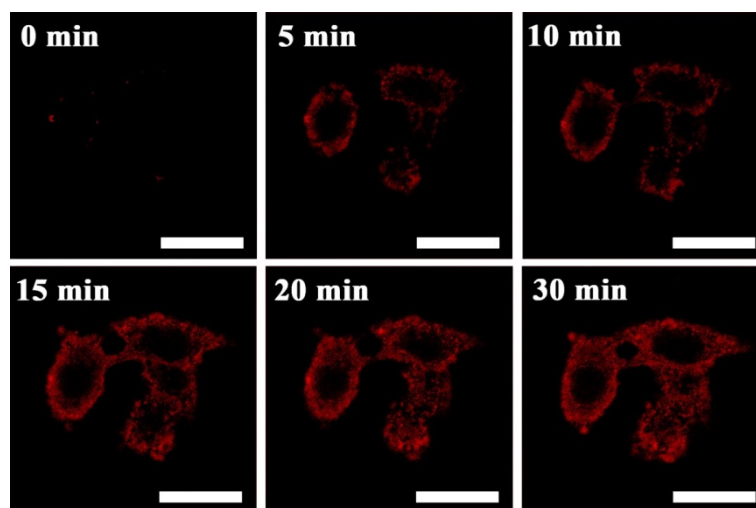

**Figure S3.** Time-lapse confocal laser scanning microscopy images of A549 cells were treated at the concentration of 16  $\mu$ g/mL MGN-II-PDA for 0, 5, 10, 15, 20, 30 min (excitation: 488 nm, emission collected: 600-650 nm ). Scale bar is 25  $\mu$ m.

#### 6. Cytotoxicity assay.

The cytotoxicity of MGN-II-PDA against the normal cell line was studied using the 3-(4, 5-dimethylthiazol-2-yl)-2, 5-diphenyltetrazolium bromide (MTT) assay. Briefly, the L929 murine fibrosarcoma cells in complete medium were seeded into 96-well plates at a density of  $1.0 \times 10^4$  cells/well and cultured overnight at 37 °C under 5% CO<sub>2</sub> before treatment. After the complete medium was removed, the MGN-II-PDA solution (100  $\mu$ L/well) at concentrations

of 8, 16, 32 and 64  $\mu\text{g/mL}$  in RPMI-1640 was added to the wells, and the cells were incubated for 24 h at 37  $^{\circ}\text{C}$  under 5%  $\text{CO}_2$ . Subsequently, 10  $\mu\text{L}$  of MTT solution (5 mg/mL in PBS) was added to the medium and the cells were incubated at 37  $^{\circ}\text{C}$  for 4 h. The resulting formazan crystals were solubilized using 100  $\mu\text{L}$  of DMSO after the growth medium was removed and the quantity determined colorimetrically using a Synergy H4 Hybrid Microplate reader (Biotek, USA) at 490 nm. Cell viability (%) was calculated using the following formula: Cell viability = (mean absorbance value of the treatment group-blank / mean absorbance value of the control-blank)  $\times$  100.

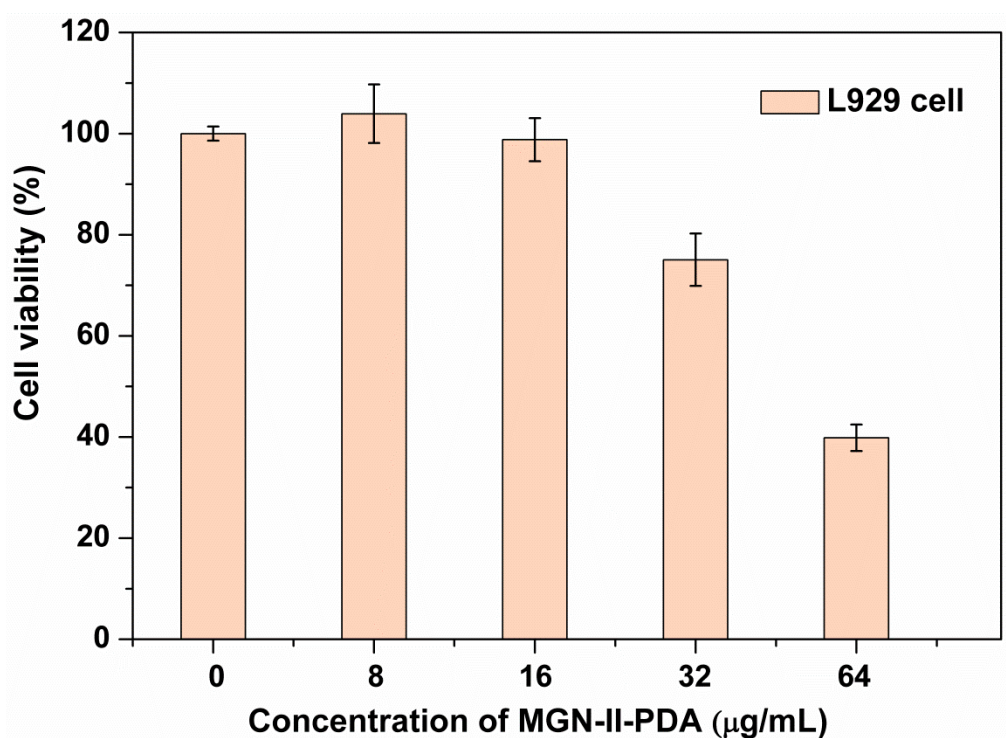

**Figure S4.** MTT assays for MGN-II-PDA in L929 cells; the cells were seeded at  $1.0 \times 10^4$  cells/well on a 96-well plate, and treated with MGN-II-PDA at concentrations of 8, 16, 32 and 64  $\mu\text{g/mL}$  in RPMI-1640 medium for 24 h, the data are presented as mean  $\pm$  SD (n = 5).

#### Reference:

- [1] Q.-H. Yao, F.-S. Meng, F.-Y. Li, H. Tian, and C.-H. Huang, *J. Mater. Chem.*, **2003**, *13*, 1048–1053.
- [2] J. Zheng, C.-H. Huang, T.-X. Wei, Y.-Y. Huang, and L.-B. Gan, *J. Mater. Chem.*, **2000**, *10*, 921–926.
